# Supplementary material for: Whole exome sequencing identifies ATRX mutation as a key molecular determinant in lower-grade glioma
Source: PubMed Central journal article supplement (PMC3717947; doi:10.18632/oncotarget.689), 2012-10-11
Supplement: oncotarget-03-1194-s001.pdf [file oncotarget-03-1194-s001.pdf]

## Whole exome sequencing identifies *ATRX* mutation as a key molecular determinant in lower-grade glioma –

Kannan et al

**Table S1: Read number and coverage statistics for whole exome sequencing performed on 4 IDH-mutant LGGs with case-matched normal.**

| Metrics                    | G4 Normal  | G4 Tumor   | G5 Normal  | G5 Tumor   | G18 Normal | G18 Tumor  | G6 Normal  | G6 Tumor   | Average        |
|----------------------------|------------|------------|------------|------------|------------|------------|------------|------------|----------------|
| GENOME_SIZE                | 3095693983 | 3095693983 | 3095693983 | 3095693983 | 3095693983 | 3095693983 | 3095693983 | 3095693983 |                |
| BAIT_TERRITORY             | 51756122   | 51756122   | 51756122   | 51756122   | 51756122   | 51756122   | 51756122   | 51756122   |                |
| TARGET_TERRITORY           | 51756122   | 51756122   | 51756122   | 51756122   | 51756122   | 51756122   | 51756122   | 51756122   |                |
| BAIT_DESIGN_EFFICIENCY     | 1          | 1          | 1          | 1          | 1          | 1          | 1          | 1          |                |
| TOTAL_READS                | 136140377  | 124399279  | 193127054  | 270696668  | 211391011  | 138118163  | 123083191  | 120412604  |                |
| PF_READS                   | 135154958  | 123273842  | 191737610  | 268247866  | 209855065  | 136871604  | 122201832  | 119319707  |                |
| PF_UNIQUE_READS            | 112950205  | 101872365  | 147766208  | 176634114  | 163123238  | 112582950  | 103001316  | 95380885   |                |
| PCT_PF_READS               | 0.992762   | 0.990953   | 0.992806   | 0.990954   | 0.992734   | 0.990975   | 0.992839   | 0.990924   |                |
| PCT_PF_UQ_READS            | 0.82966    | 0.818914   | 0.765124   | 0.652517   | 0.771666   | 0.815121   | 0.836843   | 0.792117   |                |
| PF_UQ_READS_ALIGNED        | 95866908   | 86890718   | 125056430  | 150066288  | 136452209  | 95909463   | 87663421   | 80913663   |                |
| PCT_PF_UQ_READS_ALIGNED    | 0.848754   | 0.852937   | 0.846313   | 0.849588   | 0.836498   | 0.8519     | 0.85109    | 0.848322   |                |
| PF_UQ_BASES_ALIGNED        | 3916282633 | 3609846254 | 5089321241 | 6214430031 | 5540181681 | 3976534633 | 3573499599 | 3362697220 |                |
| ON_BAIT_BASES              | 2440842236 | 2244920309 | 3201046680 | 4105730234 | 3498398004 | 2511802216 | 2260953633 | 2144004664 |                |
| NEAR_BAIT_BASES            | 1140944937 | 1055499631 | 1457363723 | 1593620365 | 1549648933 | 1128162517 | 1025319620 | 938744620  |                |
| OFF_BAIT_BASES             | 334495460  | 309426314  | 430910838  | 515079432  | 492134744  | 336569900  | 287226346  | 279947936  |                |
| ON_TARGET_BASES            | 2440842236 | 2244920309 | 3201046680 | 4105730234 | 3498398004 | 2511802216 | 2260953633 | 2144004664 |                |
| PCT_SELECTED_BASES         | 0.914589   | 0.914283   | 0.91533    | 0.917116   | 0.91117    | 0.915361   | 0.919623   | 0.916749   |                |
| PCT_OFF_BAIT               | 0.085411   | 0.085717   | 0.08467    | 0.082884   | 0.08883    | 0.084639   | 0.080377   | 0.083251   |                |
| ON_BAIT_VS_SELECTED        | 0.681459   | 0.680192   | 0.687154   | 0.720386   | 0.69302    | 0.690062   | 0.687999   | 0.695485   |                |
| MEAN_BAIT_COVERAGE         | 47.160454  | 43.374971  | 61.848658  | 79.328398  | 67.593897  | 48.5315    | 43.684757  | 41.425141  |                |
| MEAN_TARGET_COVERAGE       | 49.941324  | 45.938688  | 64.820174  | 82.918804  | 70.849348  | 51.2838    | 46.069406  | 43.667083  | <b>56.9360</b> |
| PCT_USABLE_BASES_ON_BAIT   | 0.441695   | 0.436691   | 0.409099   | 0.366793   | 0.409759   | 0.440871   | 0.453786   | 0.430487   |                |
| PCT_USABLE_BASES_ON_TARGET | 0.441695   | 0.436691   | 0.409099   | 0.366793   | 0.409759   | 0.440871   | 0.453786   | 0.430487   |                |
| FOLD_ENRICHMENT            | 37.278805  | 37.197052  | 37.620836  | 39.517131  | 37.769523  | 37.781306  | 37.843754  | 38.135922  |                |
| ZERO_CVG_TARGETS_PCT       | 0.068777   | 0.069162   | 0.057681   | 0.054544   | 0.05756    | 0.066934   | 0.064603   | 0.064252   |                |
| FOLD_80_BASE_PENALTY       | 4.161777   | 4.176244   | 4.321345   | 3.948514   | 3.728913   | 4.662164   | 4.188128   | 3.969735   |                |
| PCT_TARGET_BASES_2X        | 0.884022   | 0.884797   | 0.900662   | 0.909093   | 0.904828   | 0.886326   | 0.889255   | 0.890892   |                |
| PCT_TARGET_BASES_10X       | 0.77914    | 0.773672   | 0.811821   | 0.837209   | 0.829908   | 0.775414   | 0.779082   | 0.778127   | <b>0.7955</b>  |

|                      |           |           |           |           |           |           |           |           |
|----------------------|-----------|-----------|-----------|-----------|-----------|-----------|-----------|-----------|
| PCT_TARGET_BASES_20X | 0.670376  | 0.657514  | 0.72642   | 0.773032  | 0.756544  | 0.66737   | 0.660251  | 0.65157   |
| PCT_TARGET_BASES_30X | 0.561447  | 0.54183   | 0.642268  | 0.710438  | 0.677215  | 0.564964  | 0.541801  | 0.525149  |
| HS_LIBRARY_SIZE      | 201999973 | 176067418 | 185131944 | 146547112 | 213771006 | 192693824 | 191301053 | 137688765 |
| HS_PENALTY_10X       | 7.565977  | 7.768194  | 7.939897  | 6.992338  | 6.554674  | 8.547061  | 7.558408  | 7.453889  |
| HS_PENALTY_20X       | 8.880657  | 9.443108  | 9.61526   | 8.697407  | 7.453917  | 10.399736 | 8.987081  | 9.686605  |
| HS_PENALTY_30X       | 11.159436 | 12.912903 | 13.008943 | 12.751347 | 8.793049  | 14.300646 | 11.589813 | 17.549268 |

**Table S2: Filtered somatic mutation candidates identified by whole exome sequencing in 4 IDH-mutant LGGs.**

| Tumor | Chr   | Start Position | End Position | Ref Allele | Tumor Allele | Gene      | Mutation Type     |
|-------|-------|----------------|--------------|------------|--------------|-----------|-------------------|
| G4    | chr11 | 73105299       | 73105299     | A          | G            | RELT      | nonsynonymous SNV |
| G4    | chr13 | 29933470       | 29933470     | G          | A            | MTUS2     | nonsynonymous SNV |
| G4    | chr1  | 32264124       | 32264124     | C          | A            | SPOCD1    | nonsynonymous SNV |
| G4    | chr8  | 1574980        | 1574980      | C          | A            | DLGAP2    | nonsynonymous SNV |
| G4    | chr17 | 26907057       | 26907057     | C          | T            | SPAG5     | nonsynonymous SNV |
| G4    | chr17 | 7573988        | 7573988      | C          | T            | TP53      | nonsynonymous SNV |
| G4    | chr16 | 3293978        | 3293978      | G          | A            | MEFV      | nonsynonymous SNV |
| G4    | chr13 | 110817254      | 110817254    | C          | G            | COL4A1    | nonsynonymous SNV |
| G4    | chr3  | 124560357      | 124560357    | C          | T            | ITGB5     | nonsynonymous SNV |
| G4    | chr9  | 67930409       | 67930409     | A          | G            | ANKRD20A1 | nonsynonymous SNV |
| G4    | chr19 | 15297966       | 15297966     | C          | G            | NOTCH3    | nonsynonymous SNV |
| G4    | chr12 | 121476582      | 121476582    | C          | G            | OASL      | nonsynonymous SNV |
| G4    | chr15 | 40558665       | 40558665     | G          | A            | PAK6      | nonsynonymous SNV |
| G4    | chrX  | 134156272      | 134156272    | G          | T            | FAM127C   | nonsynonymous SNV |
| G4    | chr1  | 144828707      | 144828707    | G          | T            | NBPF9     | nonsynonymous SNV |
| G4    | chr9  | 35698501       | 35698501     | G          | A            | TLN1      | nonsynonymous SNV |
| G4    | chr15 | 76566799       | 76566799     | A          | G            | ETFA      | nonsynonymous SNV |
| G4    | chrX  | 153633801      | 153633801    | C          | G            | DNASE1L1  | nonsynonymous SNV |
| G4    | chr9  | 139413166      | 139413166    | C          | T            | NOTCH1    | nonsynonymous SNV |
| G4    | chr2  | 219925077      | 219925077    | C          | G            | IHH       | nonsynonymous SNV |
| G4    | chr15 | 56132689       | 56132689     | T          | C            | NEDD4     | nonsynonymous SNV |
| G4    | chr19 | 20045209       | 20045209     | A          | G            | ZNF93     | nonsynonymous SNV |

|    |       |           |           |   |   |          |                   |
|----|-------|-----------|-----------|---|---|----------|-------------------|
| G4 | chrX  | 47755285  | 47755285  | C | A | ZNF81    | nonsynonymous SNV |
| G4 | chr2  | 209113112 | 209113112 | C | T | IDH1     | nonsynonymous SNV |
| G4 | chr17 | 38183116  | 38183116  | T | C | MED24    | nonsynonymous SNV |
| G4 | chr11 | 6239278   | 6239278   | C | A | FAM160A2 | nonsynonymous SNV |
| G4 | chr18 | 72999306  | 72999306  | C | T | TSHZ1    | nonsynonymous SNV |
| G4 | chr2  | 206892854 | 206892854 | C | A | INO80D   | nonsynonymous SNV |
| G4 | chr1  | 19181060  | 19181060  | C | G | TAS1R2   | nonsynonymous SNV |
| G4 | chr3  | 195514585 | 195514585 | G | A | MUC4     | nonsynonymous SNV |
| G4 | chr1  | 175048754 | 175048754 | G | T | TNN      | nonsynonymous SNV |
| G4 | chr2  | 233244536 | 233244536 | G | A | ALPP     | nonsynonymous SNV |
| G4 | chr1  | 172431340 | 172431340 | T | C | C1orf105 | nonsynonymous SNV |
| G4 | chrX  | 114426538 | 114426538 | C | T | RBMXL3   | nonsynonymous SNV |
| G4 | chr7  | 72892752  | 72892752  | T | C | BAZ1B    | nonsynonymous SNV |
| G4 | chr10 | 100167674 | 100167674 | C | A | PYROXD2  | nonsynonymous SNV |
| G4 | chr17 | 72860286  | 72860286  | G | T | FDXR     | nonsynonymous SNV |
| G4 | chr9  | 131300364 | 131300364 | C | A | GLE1     | nonsynonymous SNV |
| G4 | chr19 | 1036169   | 1036169   | T | A | CNN2     | nonsynonymous SNV |
| G4 | chr5  | 176795201 | 176795201 | G | T | RGS14    | nonsynonymous SNV |
| G4 | chr11 | 17531367  | 17531367  | G | C | USH1C    | nonsynonymous SNV |
| G4 | chr5  | 141233987 | 141233987 | G | A | PCDH1    | nonsynonymous SNV |
| G4 | chr22 | 47068794  | 47068794  | C | G | GRAMD4   | nonsynonymous SNV |
| G4 | chr18 | 44140203  | 44140203  | C | A | LOXHD1   | nonsynonymous SNV |
| G4 | chr22 | 36692963  | 36692963  | C | A | MYH9     | nonsynonymous SNV |
| G4 | chr9  | 138387401 | 138387401 | G | A | C9orf116 | nonsynonymous SNV |
| G4 | chr22 | 38461028  | 38461028  | C | A | PICK1    | nonsynonymous SNV |
| G4 | chr12 | 133779878 | 133779878 | G | T | ZNF268   | nonsynonymous SNV |
| G4 | chr5  | 140250385 | 140250385 | C | T | PCDHA11  | nonsynonymous SNV |
| G4 | chr15 | 43925101  | 43925101  | A | C | CATSPER2 | nonsynonymous SNV |
| G4 | chrX  | 108780221 | 108780221 | G | A | NXT2     | nonsynonymous SNV |
| G4 | chr17 | 9511516   | 9511516   | C | A | WDR16    | nonsynonymous SNV |
| G4 | chr16 | 823026    | 823026    | G | A | MSLNL    | nonsynonymous SNV |
| G4 | chr2  | 219920500 | 219920500 | G | A | IHH      | nonsynonymous SNV |
| G4 | chr5  | 121187845 | 121187845 | G | T | FTMT     | nonsynonymous SNV |
| G4 | chr11 | 118484597 | 118484597 | C | G | PHLDB1   | nonsynonymous SNV |
| G4 | chr7  | 2978376   | 2978376   | C | A | CARD11   | nonsynonymous SNV |
| G4 | chr19 | 3614534   | 3614534   | A | T | C19orf29 | nonsynonymous SNV |

|    |       |           |           |   |   |          |                   |
|----|-------|-----------|-----------|---|---|----------|-------------------|
| G4 | chr8  | 11301797  | 11301797  | G | A | FAM167A  | nonsynonymous SNV |
| G4 | chr3  | 75787864  | 75787864  | T | A | ZNF717   | nonsynonymous SNV |
| G4 | chr22 | 43687069  | 43687069  | C | T | SCUBE1   | nonsynonymous SNV |
| G4 | chr12 | 122669189 | 122669189 | C | T | LRRC43   | nonsynonymous SNV |
| G4 | chr14 | 52485857  | 52485857  | C | T | NID2     | nonsynonymous SNV |
| G4 | chr1  | 32713192  | 32713192  | G | C | FAM167B  | nonsynonymous SNV |
| G4 | chr3  | 132440955 | 132440955 | G | T | NPHP3    | nonsynonymous SNV |
| G4 | chr3  | 10417322  | 10417322  | A | G | ATP2B2   | nonsynonymous SNV |
| G4 | chr17 | 4455494   | 4455494   | C | G | MYBBP1A  | nonsynonymous SNV |
| G4 | chr1  | 15909879  | 15909879  | C | T | AGMAT    | nonsynonymous SNV |
| G4 | chr9  | 97869409  | 97869409  | A | G | FANCC    | nonsynonymous SNV |
| G4 | chr13 | 52509103  | 52509103  | G | A | ATP7B    | nonsynonymous SNV |
| G4 | chr9  | 127245116 | 127245116 | T | C | NR5A1    | nonsynonymous SNV |
| G4 | chr10 | 37482163  | 37482163  | T | A | ANKRD30A | nonsynonymous SNV |
| G4 | chr19 | 17688845  | 17688845  | C | A | GLT25D1  | nonsynonymous SNV |
| G4 | chr19 | 39888332  | 39888332  | C | T | MED29    | nonsynonymous SNV |
| G4 | chr17 | 39411903  | 39411903  | G | C | KRTAP9-9 | nonsynonymous SNV |
| G4 | chr11 | 62458330  | 62458330  | C | A | BSCL2    | nonsynonymous SNV |
| G4 | chr10 | 13701380  | 13701380  | C | T | FRMD4A   | nonsynonymous SNV |
| G4 | chr15 | 42179639  | 42179639  | C | G | SPTBN5   | nonsynonymous SNV |
| G4 | chr19 | 41029461  | 41029461  | G | T | SPTBN4   | nonsynonymous SNV |
| G4 | chr1  | 52499135  | 52499135  | G | A | KT112    | nonsynonymous SNV |
| G4 | chr10 | 48429459  | 48429459  | G | A | GDF10    | nonsynonymous SNV |
| G4 | chr3  | 75786288  | 75786288  | A | G | ZNF717   | nonsynonymous SNV |
| G5 | chr14 | 75248079  | 75248079  | C | A | YLPM1    | nonsynonymous SNV |
| G5 | chr6  | 32551949  | 32551949  | C | G | HLA-DRB1 | nonsynonymous SNV |
| G5 | chr15 | 89400002  | 89400002  | T | G | ACAN     | nonsynonymous SNV |
| G5 | chr20 | 62120457  | 62120457  | C | T | EEF1A2   | nonsynonymous SNV |
| G5 | chr1  | 228401878 | 228401878 | A | G | OBSCN    | nonsynonymous SNV |
| G5 | chr19 | 22156758  | 22156758  | T | C | ZNF208   | nonsynonymous SNV |
| G5 | chr17 | 73909996  | 73909996  | G | T | FBF1     | nonsynonymous SNV |
| G5 | chr10 | 94645     | 94645     | C | G | TUBB8    | nonsynonymous SNV |
| G5 | chr19 | 36002431  | 36002431  | C | T | DMKN     | nonsynonymous SNV |
| G5 | chr5  | 1501639   | 1501639   | G | C | LPCAT1   | nonsynonymous SNV |
| G5 | chr22 | 51133361  | 51133361  | C | G | SHANK3   | nonsynonymous SNV |
| G5 | chr9  | 131197984 | 131197984 | C | G | CERCAM   | nonsynonymous SNV |

|    |       |           |           |   |   |              |                   |
|----|-------|-----------|-----------|---|---|--------------|-------------------|
| G5 | chr9  | 33264299  | 33264299  | T | C | BAG1         | nonsynonymous SNV |
| G5 | chr1  | 148594563 | 148594563 | G | T | NBPF15       | nonsynonymous SNV |
| G5 | chr1  | 110034112 | 110034112 | T | C | ATXN7L2      | nonsynonymous SNV |
| G5 | chr1  | 248525639 | 248525639 | A | C | OR2T4        | nonsynonymous SNV |
| G5 | chr1  | 6523132   | 6523132   | T | C | TNFRSF25     | nonsynonymous SNV |
| G5 | chr2  | 209113113 | 209113113 | G | C | IDH1         | nonsynonymous SNV |
| G5 | chr22 | 38474697  | 38474697  | C | T | SLC16A8      | nonsynonymous SNV |
| G5 | chr7  | 100644624 | 100644624 | A | T | MUC12        | nonsynonymous SNV |
| G5 | chr17 | 38347859  | 38347859  | T | C | RAPGEFL1     | nonsynonymous SNV |
| G5 | chr17 | 7577121   | 7577121   | G | A | TP53         | nonsynonymous SNV |
| G5 | chr14 | 24795075  | 24795075  | C | A | ADCY4        | nonsynonymous SNV |
| G5 | chr20 | 4228530   | 4228530   | G | A | ADRA1D       | nonsynonymous SNV |
| G5 | chr22 | 19967727  | 19967727  | G | A | ARVCF        | nonsynonymous SNV |
| G5 | chrY  | 15019451  | 15019451  | G | C | DDX3Y        | nonsynonymous SNV |
| G5 | chrX  | 152815514 | 152815514 | G | T | ATP2B3       | nonsynonymous SNV |
| G5 | chr17 | 4844266   | 4844266   | C | A | RNF167       | nonsynonymous SNV |
| G5 | chr15 | 65625687  | 65625687  | A | G | IGDCC3       | nonsynonymous SNV |
| G5 | chr19 | 11289229  | 11289229  | C | A | KANK2        | nonsynonymous SNV |
| G5 | chr9  | 117046041 | 117046041 | A | C | COL27A1      | nonsynonymous SNV |
| G5 | chr19 | 1058623   | 1058623   | G | A | ABCA7        | nonsynonymous SNV |
| G5 | chr15 | 26866488  | 26866488  | G | A | GABRB3       | nonsynonymous SNV |
| G5 | chr22 | 37628855  | 37628855  | A | G | RAC2         | nonsynonymous SNV |
| G5 | chr3  | 113673175 | 113673175 | T | C | ZDHHC23      | nonsynonymous SNV |
| G5 | chr16 | 22545979  | 22545979  | C | G | LOC100132247 | nonsynonymous SNV |
| G5 | chr7  | 150831635 | 150831635 | C | A | AGAP3        | nonsynonymous SNV |
| G5 | chr4  | 15067992  | 15067992  | C | G | CPEB2        | nonsynonymous SNV |
| G5 | chr15 | 38786776  | 38786776  | G | A | RASGRP1      | nonsynonymous SNV |
| G5 | chr2  | 219825176 | 219825176 | T | C | CDK5R2       | nonsynonymous SNV |
| G5 | chrX  | 65420541  | 65420541  | C | G | HEPH         | nonsynonymous SNV |
| G5 | chr22 | 43026916  | 43026916  | T | C | CYB5R3       | nonsynonymous SNV |
| G5 | chr21 | 34948686  | 34948686  | G | A | SON          | nonsynonymous SNV |
| G5 | chr17 | 7467018   | 7467018   | G | A | SENP3        | nonsynonymous SNV |
| G5 | chr15 | 89400003  | 89400003  | C | G | ACAN         | nonsynonymous SNV |
| G5 | chr1  | 44402402  | 44402402  | C | T | ARTN         | nonsynonymous SNV |
| G5 | chr1  | 22172706  | 22172706  | C | A | HSPG2        | nonsynonymous SNV |
| G5 | chr11 | 93416774  | 93416774  | T | C | KIAA1731     | nonsynonymous SNV |

|    |       |           |           |   |   |          |                   |
|----|-------|-----------|-----------|---|---|----------|-------------------|
| G5 | chr8  | 48842561  | 48842561  | G | A | PRKDC    | nonsynonymous SNV |
| G5 | chr1  | 148024831 | 148024831 | C | G | NBPF14   | nonsynonymous SNV |
| G5 | chr9  | 34724869  | 34724869  | C | T | FAM205A  | nonsynonymous SNV |
| G5 | chr20 | 47249148  | 47249148  | T | C | PREX1    | nonsynonymous SNV |
| G5 | chr21 | 33732214  | 33732214  | A | G | URB1     | nonsynonymous SNV |
| G5 | chr1  | 1849862   | 1849862   | A | G | TMEM52   | nonsynonymous SNV |
| G5 | chr10 | 50022092  | 50022092  | C | T | WDFY4    | nonsynonymous SNV |
| G5 | chr12 | 50190435  | 50190435  | A | G | NCKAP5L  | nonsynonymous SNV |
| G5 | chr3  | 195514214 | 195514214 | C | T | MUC4     | nonsynonymous SNV |
| G5 | chr19 | 40368418  | 40368418  | G | T | FCGBP    | nonsynonymous SNV |
| G5 | chr19 | 7056758   | 7056758   | G | T | MBD3L3   | nonsynonymous SNV |
| G5 | chr15 | 74325753  | 74325753  | C | T | PML      | nonsynonymous SNV |
| G5 | chr14 | 67647602  | 67647602  | T | C | GPHN     | nonsynonymous SNV |
| G5 | chr19 | 6010206   | 6010206   | A | G | RFX2     | nonsynonymous SNV |
| G5 | chr2  | 130872791 | 130872791 | A | G | POTEF    | nonsynonymous SNV |
| G5 | chr5  | 178460520 | 178460520 | G | T | ZNF879   | nonsynonymous SNV |
| G5 | chr1  | 220101212 | 220101212 | C | T | SLC30A10 | nonsynonymous SNV |
| G5 | chr9  | 132897358 | 132897358 | C | A | GPR107   | nonsynonymous SNV |
| G5 | chr19 | 6427150   | 6427150   | G | T | SLC25A41 | nonsynonymous SNV |
| G5 | chr1  | 41976933  | 41976933  | T | G | HIVEP3   | nonsynonymous SNV |
| G5 | chr12 | 95445686  | 95445686  | C | T | NR2C1    | nonsynonymous SNV |
| G5 | chr1  | 225533774 | 225533774 | C | A | DNAH14   | nonsynonymous SNV |
| G5 | chr16 | 58030656  | 58030656  | C | T | ZNF319   | nonsynonymous SNV |
| G5 | chr19 | 41381632  | 41381632  | G | C | CYP2A7   | nonsynonymous SNV |
| G5 | chr9  | 135983613 | 135983613 | T | C | RALGDS   | nonsynonymous SNV |
| G5 | chr3  | 183960728 | 183960728 | A | G | ALG3     | nonsynonymous SNV |
| G5 | chrX  | 49083113  | 49083113  | A | G | CACNA1F  | nonsynonymous SNV |
| G5 | chr9  | 127230066 | 127230066 | G | A | GPR144   | nonsynonymous SNV |
| G5 | chr19 | 1117395   | 1117395   | A | G | SBNO2    | nonsynonymous SNV |
| G5 | chr22 | 18314730  | 18314730  | T | C | MICAL3   | nonsynonymous SNV |
| G5 | chr8  | 12863782  | 12863782  | T | A | KIAA1456 | nonsynonymous SNV |
| G5 | chr1  | 154962897 | 154962897 | G | A | FLAD1    | nonsynonymous SNV |
| G5 | chr17 | 60767541  | 60767541  | G | A | MRC2     | nonsynonymous SNV |
| G5 | chrX  | 48978788  | 48978788  | G | T | GPKOW    | nonsynonymous SNV |
| G5 | chrX  | 92927123  | 92927123  | C | A | NAP1L3   | nonsynonymous SNV |
| G5 | chrX  | 89177635  | 89177635  | C | A | TGIF2LX  | nonsynonymous SNV |

|     |       |           |           |   |   |          |                   |
|-----|-------|-----------|-----------|---|---|----------|-------------------|
| G5  | chr16 | 4752181   | 4752181   | C | T | ANKS3    | nonsynonymous SNV |
| G5  | chr1  | 159902334 | 159902334 | C | T | IGSF9    | nonsynonymous SNV |
| G5  | chr7  | 27194580  | 27194580  | T | C | HOXA7    | nonsynonymous SNV |
| G5  | chr1  | 33235649  | 33235649  | C | G | KIAA1522 | nonsynonymous SNV |
| G5  | chr11 | 44129655  | 44129655  | T | G | EXT2     | nonsynonymous SNV |
| G5  | chr17 | 48680553  | 48680553  | C | G | CACNA1G  | nonsynonymous SNV |
| G5  | chr15 | 28437270  | 28437270  | G | C | HERC2    | nonsynonymous SNV |
| G5  | chr9  | 33264300  | 33264300  | C | T | BAG1     | nonsynonymous SNV |
| G5  | chr3  | 49700545  | 49700545  | C | T | BSN      | nonsynonymous SNV |
| G5  | chr17 | 15620009  | 15620009  | G | A | ZNF286A  | nonsynonymous SNV |
| G5  | chr11 | 119058332 | 119058332 | G | T | PDZD3    | nonsynonymous SNV |
| G5  | chr5  | 6449287   | 6449287   | C | A | UBE2QL1  | nonsynonymous SNV |
| G5  | chr5  | 1074784   | 1074784   | G | A | SLC12A7  | nonsynonymous SNV |
| G5  | chrX  | 107979055 | 107979055 | C | A | IRS4     | nonsynonymous SNV |
| G5  | chr4  | 57189669  | 57189669  | C | T | KIAA1211 | nonsynonymous SNV |
| G5  | chr20 | 62120453  | 62120453  | A | G | EEF1A2   | nonsynonymous SNV |
| G5  | chr22 | 50703381  | 50703381  | T | C | MAPK11   | nonsynonymous SNV |
| G5  | chr7  | 100641088 | 100641088 | C | T | MUC12    | nonsynonymous SNV |
| G5  | chr16 | 14970361  | 14970361  | C | A | NOMO1    | nonsynonymous SNV |
| G5  | chr13 | 106142411 | 106142411 | C | A | DAOA     | nonsynonymous SNV |
| G5  | chr17 | 48628425  | 48628425  | G | A | SPATA20  | nonsynonymous SNV |
| G5  | chr6  | 32551948  | 32551948  | G | C | HLA-DRB1 | nonsynonymous SNV |
| G18 | chr8  | 72977777  | 72977777  | C | T | TRPA1    | nonsynonymous SNV |
| G18 | chr1  | 152276231 | 152276231 | G | T | FLG      | nonsynonymous SNV |
| G18 | chr11 | 49196449  | 49196449  | T | C | FOLH1    | nonsynonymous SNV |
| G18 | chr7  | 47879087  | 47879087  | T | C | PKD1L1   | nonsynonymous SNV |
| G18 | chr14 | 23829927  | 23829927  | C | T | EFS      | nonsynonymous SNV |
| G18 | chr19 | 21476393  | 21476393  | A | T | ZNF708   | nonsynonymous SNV |
| G18 | chr17 | 4451541   | 4451541   | A | T | MYBBP1A  | nonsynonymous SNV |
| G18 | chr19 | 58499659  | 58499659  | C | T | ZNF606   | nonsynonymous SNV |
| G18 | chr16 | 48234267  | 48234267  | C | T | ABCC11   | nonsynonymous SNV |
| G18 | chr1  | 25890257  | 25890257  | C | A | LDLRAP1  | nonsynonymous SNV |
| G18 | chr9  | 33264299  | 33264299  | T | C | BAG1     | nonsynonymous SNV |
| G18 | chr10 | 104416749 | 104416749 | G | A | TRIM8    | nonsynonymous SNV |
| G18 | chr16 | 31092038  | 31092038  | T | C | ZNF646   | nonsynonymous SNV |
| G18 | chr16 | 67685908  | 67685908  | G | T | RLTPR    | nonsynonymous SNV |

|     |       |           |           |   |   |           |                   |
|-----|-------|-----------|-----------|---|---|-----------|-------------------|
| G18 | chr4  | 156832695 | 156832695 | T | G | TDO2      | nonsynonymous SNV |
| G18 | chr3  | 127337871 | 127337871 | A | G | MCM2      | nonsynonymous SNV |
| G18 | chr3  | 126730984 | 126730984 | C | G | PLXNA1    | nonsynonymous SNV |
| G18 | chr2  | 209113112 | 209113112 | C | T | IDH1      | nonsynonymous SNV |
| G18 | chr22 | 36678799  | 36678799  | C | G | MYH9      | nonsynonymous SNV |
| G18 | chr19 | 59069703  | 59069703  | A | C | UBE2M     | nonsynonymous SNV |
| G18 | chr2  | 27668237  | 27668237  | T | C | IFT172    | nonsynonymous SNV |
| G18 | chr17 | 61621402  | 61621402  | C | T | KCNH6     | nonsynonymous SNV |
| G18 | chr9  | 130507324 | 130507324 | G | A | SH2D3C    | nonsynonymous SNV |
| G18 | chr1  | 151260733 | 151260733 | C | T | ZNF687    | nonsynonymous SNV |
| G18 | chr3  | 114070191 | 114070191 | G | A | ZBTB20    | nonsynonymous SNV |
| G18 | chr22 | 36897395  | 36897395  | C | T | FOXRED2   | nonsynonymous SNV |
| G18 | chr11 | 61503253  | 61503253  | G | A | DAGLA     | nonsynonymous SNV |
| G18 | chr8  | 119936828 | 119936828 | A | C | TNFRSF11B | nonsynonymous SNV |
| G18 | chr16 | 67579636  | 67579636  | A | G | FAM65A    | nonsynonymous SNV |
| G18 | chr9  | 69423863  | 69423863  | T | A | ANKRD20A4 | nonsynonymous SNV |
| G18 | chr1  | 113255054 | 113255054 | C | T | PPM1J     | nonsynonymous SNV |
| G18 | chr9  | 96021681  | 96021681  | C | G | WNK2      | nonsynonymous SNV |
| G18 | chr19 | 53787734  | 53787734  | G | C | LOC646508 | nonsynonymous SNV |
| G18 | chr2  | 108487999 | 108487999 | A | G | RGPD4     | nonsynonymous SNV |
| G18 | chr6  | 27925370  | 27925370  | A | G | OR2B6     | nonsynonymous SNV |
| G18 | chr10 | 94828227  | 94828227  | C | A | CYP26C1   | nonsynonymous SNV |
| G18 | chr4  | 13383173  | 13383173  | C | T | RAB28     | nonsynonymous SNV |
| G18 | chr6  | 168366443 | 168366443 | C | G | MLLT4     | nonsynonymous SNV |
| G18 | chr19 | 40519663  | 40519663  | T | A | ZNF546    | nonsynonymous SNV |
| G18 | chr17 | 7259572   | 7259572   | G | C | TMEM95    | nonsynonymous SNV |
| G18 | chr9  | 33264300  | 33264300  | C | T | BAG1      | nonsynonymous SNV |
| G18 | chr16 | 85114956  | 85114956  | A | G | KIAA0513  | nonsynonymous SNV |
| G18 | chr19 | 3746495   | 3746495   | C | A | TJP3      | nonsynonymous SNV |
| G18 | chr1  | 228511047 | 228511047 | A | T | OBSCN     | nonsynonymous SNV |
| G18 | chr9  | 96422757  | 96422757  | C | A | PHF2      | nonsynonymous SNV |
| G18 | chrX  | 100076521 | 100076521 | A | G | CSTF2     | nonsynonymous SNV |
| G18 | chr16 | 10971191  | 10971191  | C | A | CIITA     | nonsynonymous SNV |
| G18 | chrX  | 152858156 | 152858156 | C | A | FAM58A    | nonsynonymous SNV |
| G18 | chr11 | 64074707  | 64074707  | G | A | ESRRA     | nonsynonymous SNV |
| G18 | chr2  | 86333393  | 86333393  | G | T | PTCD3     | nonsynonymous SNV |



|     |       |           |           |   |   |          |                   |
|-----|-------|-----------|-----------|---|---|----------|-------------------|
| G18 | chr20 | 60791441  | 60791441  | A | G | HRH3     | nonsynonymous SNV |
| G18 | chr22 | 51121841  | 51121841  | T | C | SHANK3   | nonsynonymous SNV |
| G18 | chr1  | 39878662  | 39878662  | G | A | KIAA0754 | nonsynonymous SNV |
| G18 | chr11 | 74904518  | 74904518  | C | T | SLCO2B1  | nonsynonymous SNV |
| G18 | chr13 | 99093076  | 99093076  | A | G | FARP1    | nonsynonymous SNV |
| G18 | chr17 | 7637506   | 7637506   | C | T | DNAH2    | nonsynonymous SNV |
| G18 | chr1  | 84880381  | 84880381  | G | A | DNASE2B  | nonsynonymous SNV |
| G18 | chr14 | 105395093 | 105395093 | C | A | PLD4     | nonsynonymous SNV |
| G18 | chr2  | 96781258  | 96781258  | C | T | ADRA2B   | nonsynonymous SNV |
| G18 | chr17 | 61607853  | 61607853  | C | T | KCNH6    | nonsynonymous SNV |
| G18 | chr2  | 130878055 | 130878055 | A | C | POTEF    | nonsynonymous SNV |
| G6  | chr16 | 21415837  | 21415837  | C | T | NPIPL3   | nonsynonymous SNV |
| G6  | chr19 | 21607526  | 21607526  | A | G | ZNF493   | nonsynonymous SNV |
| G6  | chr19 | 51958020  | 51958020  | C | A | SIGLEC8  | nonsynonymous SNV |
| G6  | chr16 | 57075470  | 57075470  | G | A | NLRC5    | nonsynonymous SNV |
| G6  | chr11 | 3111847   | 3111847   | G | T | OSBPL5   | nonsynonymous SNV |
| G6  | chr7  | 44805769  | 44805769  | G | A | ZMIZ2    | nonsynonymous SNV |
| G6  | chr19 | 45404543  | 45404543  | C | T | TOMM40   | nonsynonymous SNV |
| G6  | chr19 | 15569347  | 15569347  | C | A | RASAL3   | nonsynonymous SNV |
| G6  | chr10 | 129676535 | 129676535 | C | T | CLRN3    | nonsynonymous SNV |
| G6  | chr16 | 67866389  | 67866389  | G | A | CENPT    | nonsynonymous SNV |
| G6  | chr14 | 24601017  | 24601017  | G | A | FITM1    | nonsynonymous SNV |
| G6  | chr19 | 55147967  | 55147967  | C | T | LILRB1   | nonsynonymous SNV |
| G6  | chr2  | 220250367 | 220250367 | G | A | DNPEP    | nonsynonymous SNV |
| G6  | chr1  | 145328389 | 145328389 | C | G | NBPF10   | nonsynonymous SNV |
| G6  | chr19 | 40704322  | 40704322  | C | A | MAP3K10  | nonsynonymous SNV |
| G6  | chr11 | 47609666  | 47609666  | C | T | FAM180B  | nonsynonymous SNV |
| G6  | chr12 | 6960102   | 6960102   | C | A | CDCA3    | nonsynonymous SNV |
| G6  | chr6  | 32729439  | 32729439  | T | C | HLA-DQB2 | nonsynonymous SNV |
| G6  | chr17 | 34325937  | 34325937  | G | A | CCL15    | nonsynonymous SNV |
| G6  | chr1  | 207793287 | 207793287 | G | T | CR1      | nonsynonymous SNV |
| G6  | chrX  | 152226781 | 152226781 | C | A | PNMA3    | nonsynonymous SNV |
| G6  | chr1  | 152187981 | 152187981 | G | A | HRNR     | nonsynonymous SNV |
| G6  | chr11 | 60702808  | 60702808  | G | A | TMEM132A | nonsynonymous SNV |
| G6  | chr3  | 17446233  | 17446233  | C | A | TBC1D5   | nonsynonymous SNV |
| G6  | chr7  | 158534524 | 158534524 | G | A | ESYT2    | nonsynonymous SNV |

|    |       |           |           |   |   |          |                   |
|----|-------|-----------|-----------|---|---|----------|-------------------|
| G6 | chr10 | 71851577  | 71851577  | C | G | H2AFY2   | nonsynonymous SNV |
| G6 | chr17 | 7577121   | 7577121   | G | A | TP53     | nonsynonymous SNV |
| G6 | chr2  | 209113112 | 209113112 | C | T | IDH1     | nonsynonymous SNV |
| G6 | chr19 | 2853583   | 2853583   | T | C | ZNF555   | nonsynonymous SNV |
| G6 | chr21 | 44838355  | 44838355  | G | A | SIK1     | nonsynonymous SNV |
| G6 | chr3  | 48462284  | 48462284  | G | A | PLXNB1   | nonsynonymous SNV |
| G6 | chr19 | 51453207  | 51453207  | C | A | KLK5     | nonsynonymous SNV |
| G6 | chr8  | 145057709 | 145057709 | A | G | PARP10   | nonsynonymous SNV |
| G6 | chr2  | 120231120 | 120231120 | C | T | SCTR     | nonsynonymous SNV |
| G6 | chr20 | 62421617  | 62421617  | C | A | ZBTB46   | nonsynonymous SNV |
| G6 | chr19 | 42879986  | 42879986  | C | A | MEGF8    | nonsynonymous SNV |
| G6 | chr7  | 44805006  | 44805006  | C | A | ZMIZ2    | nonsynonymous SNV |
| G6 | chr15 | 90016033  | 90016033  | G | A | RHCG     | nonsynonymous SNV |
| G6 | chr2  | 228131171 | 228131171 | G | C | COL4A3   | nonsynonymous SNV |
| G6 | chr22 | 50967656  | 50967656  | C | G | TYMP     | nonsynonymous SNV |
| G6 | chr19 | 36332727  | 36332727  | C | T | NPHS1    | nonsynonymous SNV |
| G6 | chr16 | 71482897  | 71482897  | C | G | ZNF23    | nonsynonymous SNV |
| G6 | chr3  | 128890358 | 128890358 | G | C | CNBP     | nonsynonymous SNV |
| G6 | chr3  | 195507733 | 195507733 | C | A | MUC4     | nonsynonymous SNV |
| G6 | chrX  | 118242329 | 118242329 | C | A | KIAA1210 | nonsynonymous SNV |
| G6 | chr19 | 39111041  | 39111041  | T | C | EIF3K    | nonsynonymous SNV |
| G6 | chr17 | 2966250   | 2966250   | A | G | OR1D5    | nonsynonymous SNV |
| G6 | chr19 | 18542851  | 18542851  | C | A | SSBP4    | nonsynonymous SNV |
| G6 | chr4  | 86332     | 86332     | A | C | ZNF595   | nonsynonymous SNV |
| G6 | chr14 | 105618064 | 105618064 | C | T | JAG2     | nonsynonymous SNV |
| G6 | chr11 | 6566458   | 6566458   | A | G | DNHD1    | nonsynonymous SNV |
| G6 | chr16 | 65038741  | 65038741  | A | G | CDH11    | nonsynonymous SNV |
| G6 | chr21 | 37618511  | 37618511  | G | T | DOPEY2   | nonsynonymous SNV |
| G6 | chr2  | 96949592  | 96949592  | G | A | SNRNP200 | nonsynonymous SNV |
| G6 | chrX  | 152087589 | 152087589 | A | T | ZNF185   | nonsynonymous SNV |
| G6 | chr20 | 44578183  | 44578183  | C | A | ZNF335   | nonsynonymous SNV |
| G6 | chr19 | 30199181  | 30199181  | C | T | C19orf12 | nonsynonymous SNV |
| G6 | chr22 | 38013036  | 38013036  | C | A | GGA1     | nonsynonymous SNV |
| G6 | chr1  | 165177361 | 165177361 | C | G | LMX1A    | nonsynonymous SNV |
| G6 | chr15 | 24923230  | 24923230  | C | T | C15orf2  | nonsynonymous SNV |
| G6 | chr18 | 3214971   | 3214971   | C | T | MYOM1    | nonsynonymous SNV |

|     |       |           |           |   |   |          |                   |
|-----|-------|-----------|-----------|---|---|----------|-------------------|
| G6  | chr2  | 120438965 | 120438965 | G | T | TMEM177  | nonsynonymous SNV |
| G6  | chr19 | 44097404  | 44097404  | C | A | IRGQ     | nonsynonymous SNV |
| G6  | chr6  | 158923594 | 158923594 | C | A | TULP4    | nonsynonymous SNV |
| G6  | chr19 | 20727481  | 20727481  | T | G | ZNF737   | nonsynonymous SNV |
| G6  | chr17 | 80146158  | 80146158  | T | C | CCDC57   | nonsynonymous SNV |
| G6  | chr10 | 81706408  | 81706408  | A | G | SFTPD    | nonsynonymous SNV |
| G6  | chr11 | 67270108  | 67270108  | C | A | PITPNM1  | nonsynonymous SNV |
| G6  | chr8  | 22414397  | 22414397  | C | A | SORBS3   | nonsynonymous SNV |
| G6  | chr12 | 122359384 | 122359384 | G | A | WDR66    | nonsynonymous SNV |
| G6  | chr12 | 122359392 | 122359392 | G | A | WDR66    | nonsynonymous SNV |
| G4  | chr4  | 123234782 | 123234782 | G | T | KIAA1109 | splicing          |
| G4  | chr8  | 17928901  | 17928901  | T | C | ASAH1    | splicing          |
| G4  | chr9  | 35698501  | 35698501  | G | A | TLN1     | splicing          |
| G4  | chr2  | 24246452  | 24246452  | G | A | MFSD2B   | splicing          |
| G4  | chr1  | 209878137 | 209878137 | G | C | HSD11B1  | splicing          |
| G4  | chr2  | 238990850 | 238990850 | G | A | SCLY     | splicing          |
| G4  | chr3  | 146309505 | 146309505 | A | G | PLSCR5   | splicing          |
| G4  | chr15 | 42179639  | 42179639  | C | G | SPTBN5   | splicing          |
| G5  | chr1  | 6523132   | 6523132   | T | C | TNFRSF25 | splicing          |
| G5  | chr2  | 138033493 | 138033493 | G | C | THSD7B   | splicing          |
| G5  | chr6  | 37139268  | 37139268  | G | T | PIM1     | splicing          |
| G5  | chr19 | 11289229  | 11289229  | C | A | KANK2    | splicing          |
| G5  | chr9  | 117046041 | 117046041 | A | C | COL27A1  | splicing          |
| G5  | chr1  | 11009681  | 11009681  | T | C | C1orf127 | splicing          |
| G5  | chr1  | 41976933  | 41976933  | T | G | HIVEP3   | splicing          |
| G5  | chr10 | 90365388  | 90365388  | A | T | LIPJ     | splicing          |
| G5  | chr10 | 94822753  | 94822753  | G | T | CYP26C1  | splicing          |
| G18 | chr4  | 123234782 | 123234782 | G | T | KIAA1109 | splicing          |
| G18 | chr2  | 165984613 | 165984613 | T | G | SCN3A    | splicing          |
| G18 | chr3  | 127337871 | 127337871 | A | G | MCM2     | splicing          |
| G6  | chr15 | 41853737  | 41853737  | C | T | TYRO3    | splicing          |
| G4  | chr2  | 45235738  | 45235738  | C | T | SIX2     | stopgain SNV      |
| G4  | chr15 | 23006364  | 23006364  | G | A | NIPA2    | stopgain SNV      |
| G5  | chr16 | 68293443  | 68293443  | G | A | PLA2G15  | stopgain SNV      |
| G5  | chr11 | 45935984  | 45935984  | G | A | PEX16    | stopgain SNV      |
| G5  | chr1  | 36028217  | 36028217  | G | A | NCDN     | stopgain SNV      |

|     |       |           |           |                              |     |           |                         |
|-----|-------|-----------|-----------|------------------------------|-----|-----------|-------------------------|
| G5  | chr6  | 43251678  | 43251678  | C                            | A   | TTBK1     | stopgain SNV            |
| G18 | chr1  | 8386053   | 8386053   | C                            | A   | SLC45A1   | stopgain SNV            |
| G18 | chr21 | 45797623  | 45797623  | C                            | A   | TRPM2     | stopgain SNV            |
| G18 | chr17 | 2604444   | 2604444   | G                            | A   | KIAA0664  | stopgain SNV            |
| G18 | chrX  | 76909629  | 76909629  | G                            | A   | ATRX      | stopgain SNV            |
| G18 | chr13 | 32340147  | 32340147  | C                            | A   | RXFP2     | stopgain SNV            |
| G6  | chr22 | 50660214  | 50660214  | C                            | T   | TUBGCP6   | stopgain SNV            |
| G6  | chr22 | 17264513  | 17264513  | G                            | C   | XKR3      | stopgain SNV            |
| G6  | chr20 | 870963    | 870963    | G                            | A   | ANGPT4    | stopgain SNV            |
| G6  | chr9  | 39888046  | 39888046  | G                            | T   | FAM75A2   | stopgain SNV            |
| G6  | chr4  | 8228775   | 8228775   | C                            | T   | SH3TC1    | stopgain SNV            |
| G6  | chr2  | 192234306 | 192234306 | C                            | G   | MYO1B     | stopgain SNV            |
| G4  | chr11 | 89774214  | 89774217  | TGCA                         | -   | TRIM49L2  | splicing                |
| G4  | chr5  | 139940606 | 139940616 | TGGCCTTGGTG                  | -   | APBB3     | frameshift deletion     |
| G4  | chr5  | 140953561 | 140953563 | GGT                          | -   | DIAPH1    | nonframeshift deletion  |
| G5  | chr17 | 39274069  | 39274070  | GG                           | -   | KRTAP4-11 | frameshift deletion     |
| G5  | chr17 | 43011619  | 43011620  | AT                           | -   | KIF18B    | frameshift deletion     |
| G5  | chr19 | 55341421  | 55341422  | AC                           | -   | KIR3DL1   | frameshift deletion     |
| G5  | chr3  | 49851379  | 49851406  | GAGAAAAGAAAAGTGAAAGTTAAACTAT | -   | UBA7      | splicing                |
| G5  | chr3  | 75787099  | 75787100  | CT                           | -   | ZNF717    | frameshift deletion     |
| G5  | chr5  | 139931628 | 139931628 | -                            | GTC | SRA1      | nonframeshift insertion |
| G5  | chr7  | 142481376 | 142481383 | TGGGGGTG                     | -   | PRSS2     | nonframeshift deletion  |
| G5  | chrX  | 76937745  | 76937745  | T                            | -   | ATRX      | frameshift deletion     |
| G18 | chr11 | 3661583   | 3661583   | -                            | GAT | ART5      | nonframeshift insertion |
| G18 | chr22 | 50754644  | 50754649  | CAGGTG                       | -   | FAM116B   | nonframeshift deletion  |
| G18 | chr3  | 43074430  | 43074445  | AGCTCATCAGTGGCCT             | -   | FAM198A   | frameshift deletion     |
| G18 | chr6  | 32497961  | 32497962  | TT                           | -   | HLA-DRB5  | frameshift deletion     |
| G6  | chr11 | 6567886   | 6567895   | TTGAGGAGGC                   | -   | DNHD1     | frameshift deletion     |
| G6  | chr19 | 875243    | 875247    | CCGAC                        | -   | MED16     | frameshift deletion     |
| G6  | chrX  | 76938832  | 76938832  | A                            | -   | ATRX      | frameshift deletion     |

**Table S3: Tabulated nucleotide transitions for point mutations seen in filtered whole exome sequencing data for 4 IDH-mutant LGGs. Reference and mutant bases are shown in the first column and row respectively.**

|   |    |    |    |    |
|---|----|----|----|----|
|   | A  | C  | T  | G  |
| A |    | 8  | 7  | 35 |
| C | 59 |    | 62 | 32 |
| T | 6  | 33 |    | 7  |
| G | 63 | 16 | 30 |    |

**Table S4: Tabulated nucleotide transitions for point mutations seen in filtered whole exome sequencing data for 4 IDH-mutant LGGs. Mutations involving either C or G transitions to either T or A predominate. Reference and mutant bases are shown in the first column and row respectively.**

|     |     |     |
|-----|-----|-----|
|     | T:A | C:G |
| T:A |     | 83  |
| C:G | 214 |     |

**Table S5: Numbers of unfiltered somatic variants identified by whole exome sequencing in 4 IDH-mutant LGGs.**

| Tumor   | SNVs  | insertions/deletions | Total          |
|---------|-------|----------------------|----------------|
| G4      | 4408  | 212                  | 4620           |
| G5      | 6315  | 286                  | 6601           |
| G18     | 4157  | 176                  | 4333           |
| G6      | 4139  | 190                  | 4329           |
| Sum     | 19019 | 864                  | 19883          |
| Average |       |                      | <b>4970.75</b> |

**Table S6: Candidate somatic variants identified by whole exome sequencing in 4 IDH-mutant LGGs that were then subjected to validation by Sanger sequencing.**

| Gene     | Tumor | Chr Position   | AA Change | Reference | Variant | Effect              |
|----------|-------|----------------|-----------|-----------|---------|---------------------|
| TP53     | G4    | chr17:7573988  | p.A347T   | C         | T       | missense            |
| TP53     | G5    | chr17:7577121  | p.R273C   | G         | A       | missense            |
| TP53     | G6    | chr17:7577121  | p.R273C   | G         | A       | missense            |
| IDH1     | G4    | chr2:209113112 | p.R132H   | C         | T       | missense            |
| IDH1     | G5    | chr2:209113113 | p.R132G   | G         | C       | missense            |
| IDH1     | G18   | chr2:209113112 | p.R132H   | C         | T       | missense            |
| IDH1     | G6    | chr2:209113112 | p.R132H   | C         | T       | missense            |
| MUC4     | G4    | chr3:195514585 | p.A1289V  | G         | A       | missense            |
| MUC4     | G5    | chr3:195514214 | p.D1413N  | C         | T       | missense            |
| MUC4     | G6    | chr3:195507733 | p.S3573I  | C         | A       | missense            |
| MYH9     | G4    | chr22:36692963 | p.E1066D  | C         | A       | missense            |
| MYH9     | G18   | chr22:36678799 | p.R1933P  | C         | G       | missense            |
| MYBBP1A  | G4    | chr17:4455494  | p.K277N   | C         | G       | missense            |
| MYBBP1A  | G18   | chr17:4451541  | p.W541R   | A         | T       | missense            |
| KIAA1109 | G4    | chr4:123234782 | NA        | G         | T       | splicing            |
| KIAA1109 | G18   | chr4:123234782 | NA        | G         | T       | splicing            |
| BAG1     | G5    | chr9:33264300  | p.D125N   | C         | T       | missense            |
| BAG1     | G18   | chr9:33264299  | p.D125G   | T         | C       | missense            |
| POTEF    | G5    | chr2:130872791 | p.I211T   | A         | G       | missense            |
| POTEF    | G18   | chr2:130878055 | p.S12A    | A         | C       | missense            |
| SHANK3   | G5    | chr22:51133361 | p.P397A   | C         | G       | missense            |
| SHANK3   | G18   | chr22:51121841 | p.F320S   | T         | C       | missense            |
| NBPF14   | G5    | chr1:148024831 | p.E56Q    | C         | G       | missense            |
| NBPF14   | G6    | chr1:148024796 | p.P67P    | C         | T       | missense            |
| ATRX     | G5    | chrX:76937745  | p.K1001fs | T         | N/A     | frameshift deletion |
| ATRX     | G6    | chrX:76938832  | p.L639fs  | A         | N/A     | frameshift deletion |
| ATRX     | G18   | chrX:76909629  | p.R1426X  | G         | A       | nonsense            |
| OR2B6    | G18   | chr6:27925370  | p.M118V   | A         | G       | missense            |
| ABCC11   | G18   | chr16:48234267 | p.V668M   | C         | T       | missense            |
| GABRB3   | G5    | chr15:26866488 | p.P145L   | G         | A       | missense            |

|           |     |                |                |   |     |                         |
|-----------|-----|----------------|----------------|---|-----|-------------------------|
| NEDD4     | G4  | chr15:56132689 | p.M1082V       | T | C   | missense                |
| TDO2      | G18 | chr4:156832695 | p.F222C        | T | G   | missense                |
| DLGAP2    | G4  | chr8:1574980   | p.P505Q        | C | A   | missense                |
| TNFRSF11B | G18 | chr8:119936828 | p.L331M        | A | T   | missense                |
| ITGB5     | G4  | chr3:124560357 | p.R218H        | C | T   | missense                |
| ZNF546    | G18 | chr19:40519663 | p.S162R        | T | A   | missense                |
| CR1       | G6  | chr1:207793287 | p.V1927L       | G | T   | missense                |
| KIAA1731  | G5  | chr11:93416774 | p.L272P        | T | C   | missense                |
| HERC2     | G5  | chr15:28437270 | p.S2763C       | G | C   | missense                |
| KIAA1211  | G5  | chr4:57189669  | p.A1105V       | C | T   | missense                |
| ETFPA     | G4  | chr15:76566799 | p.V257A        | A | G   | missense                |
| EXT2      | G5  | chr11:44129655 | p.N131K        | T | G   | missense                |
| SRA1      | G5  | chr5:139931628 | p.V110delinsGL | G | GTC | nonframeshift insertion |

**Table S7: Read number and coverage statistics for MiSeq sequencing of expansion LGG cohort and case-matched normal (N=28).**

| <b>Sample</b> | <b>Total Reads</b> | <b>Mean/Base</b> | <b>% above 10 reads</b> | <b>% above 100 reads</b> |
|---------------|--------------------|------------------|-------------------------|--------------------------|
| G7 Normal     | 26704934           | 115.97           | 71.1                    | 47.7                     |
| G7 Tumor      | 30099131           | 130.71           | 74.9                    | 51.7                     |
| G1 Normal     | 27878344           | 121.07           | 72.3                    | 50.7                     |
| G1 Tumor      | 16918465           | 73.47            | 72.3                    | 29.9                     |
| G24 Normal    | 21375181           | 92.83            | 74.6                    | 43.5                     |
| G24 Tumor     | 30969017           | 134.49           | 76.4                    | 52.9                     |
| G3 Normal     | 17425444           | 75.67            | 71.4                    | 35.9                     |
| G3 Tumor      | 27205600           | 118.14           | 75.2                    | 51.2                     |
| G8 Normal     | 2538888            | 11.03            | 43.2                    | 0                        |
| G8 Tumor      | 23174871           | 100.64           | 67.4                    | 44.9                     |
| G26 Normal    | 2311587            | 10.04            | 41.7                    | 0                        |
| G26 Tumor     | 29645261           | 128.74           | 70.1                    | 50.8                     |
| G9 Normal     | 19597769           | 85.11            | 74                      | 38.1                     |
| G9 Tumor      | 19260898           | 83.64            | 63.9                    | 35.6                     |
| G10 Normal    | 16435277           | 71.37            | 70.3                    | 32.5                     |
| G10 Tumor     | 21944595           | 95.3             | 63                      | 40.6                     |
| G22 Normal    | 17651479           | 76.65            | 66.8                    | 38.1                     |
| G22 Tumor     | 20237140           | 87.88            | 70.1                    | 35.3                     |
| G11 Normal    | 15017483           | 65.22            | 62.3                    | 32.4                     |

|            |          |        |      |      |
|------------|----------|--------|------|------|
| G11 Tumor  | 29198216 | 126.8  | 75.4 | 50.5 |
| G2 Normal  | 19109611 | 82.99  | 68.9 | 39.7 |
| G2 Tumor   | 25657363 | 111.42 | 80.8 | 49.8 |
| G27 Normal | 16984467 | 73.76  | 61.9 | 36.4 |
| G27 Tumor  | 21087345 | 91.58  | 74.4 | 43.5 |
| G14 Normal | 15651297 | 67.97  | 60.9 | 33.1 |
| G14 Tumor  | 19796198 | 85.97  | 68.5 | 38.9 |
| G21 Normal | 15511623 | 67.36  | 70.8 | 31.2 |
| G21 Tumor  | 24049473 | 104.44 | 67.9 | 42.9 |
| G12 Normal | 19856289 | 86.23  | 78.3 | 41.7 |
| G12 Tumor  | 23838475 | 103.52 | 71.1 | 43.5 |
| G31 Normal | 19724762 | 85.66  | 78.6 | 37.7 |
| G31 Tumor  | 21918440 | 95.18  | 64.4 | 39.8 |
| G25 Normal | 15223723 | 66.11  | 74.2 | 28.4 |
| G25 Tumor  | 25493736 | 110.71 | 59.7 | 44.7 |
| G15 Normal | 19398747 | 84.24  | 74   | 37.2 |
| G15 Tumor  | 17599539 | 76.43  | 73.2 | 31.8 |
| G16 Normal | 18149701 | 78.82  | 71.1 | 38.1 |
| G16 Tumor  | 23725378 | 103.03 | 77.6 | 50.1 |
| G28 Normal | 14431151 | 62.67  | 60.1 | 28.9 |
| G28 Tumor  | 17873194 | 77.62  | 81   | 30.7 |
| G29 Normal | 16668909 | 72.39  | 62.4 | 34.9 |
| G29 Tumor  | 28016392 | 121.67 | 82   | 51.3 |
| G30 Normal | 19904354 | 86.44  | 69.6 | 42.2 |
| G30 Tumor  | 12157396 | 52.8   | 78.5 | 11.6 |
| G17 Normal | 18163608 | 78.88  | 71.1 | 38.1 |
| G17 Tumor  | 21535945 | 93.52  | 78.2 | 45.9 |
| G32 Normal | 17336318 | 75.29  | 74.4 | 34.9 |
| G32 Tumor  | 25863718 | 112.32 | 77   | 50.2 |
| G20 Normal | 14358282 | 62.35  | 73.3 | 26   |
| G20 Tumor  | 23479121 | 101.96 | 76.4 | 42.9 |
| G19 Normal | 16253201 | 70.58  | 77.2 | 30.3 |
| G19 Tumor  | 21305825 | 92.52  | 74.5 | 43.1 |
| G13 Normal | 13058788 | 56.71  | 74.1 | 21.5 |
| G13 Tumor  | 19194839 | 83.36  | 77.3 | 35.9 |
| G23 Normal | 15614436 | 67.81  | 70.6 | 30.8 |
| G23 Tumor  | 15263496 | 66.28  | 75.9 | 24.6 |

---



**Table S8: 75-gene signature (25 genes per subclass) used to develop the Nanostring classifier. NB: neuroblastic, EPL: early progenitor-like, PG: pregliaoblastoma, ROC: receiver operator characteristic.**

| <b>NB Genes</b> | <b>ROC Score</b> | <b>EPL Genes</b> | <b>ROC Score</b> | <b>PG Genes</b> | <b>ROC Score</b> |
|-----------------|------------------|------------------|------------------|-----------------|------------------|
| BMP2            | 1.86702          | PSG7             | 1.85817          | FKBP9           | 1.89085          |
| GALNT13         | 1.80148          | KLHL14           | 1.84682          | TAGLN2          | 1.8807           |
| PCDH15          | 1.76824          | PSG1             | 1.84547          | VASN            | 1.87932          |
| MDGA2           | 1.76526          | CDKL2            | 1.83459          | PDPN            | 1.87578          |
| FERMT1          | 1.76203          | KCNH5            | 1.82959          | EMP3            | 1.87228          |
| FHDC1           | 1.75793          | POM121L10P       | 1.82682          | ARSD            | 1.85618          |
| PSITPTE22       | 1.74946          | BPIL2            | 1.82209          | PION            | 1.85452          |
| MYC             | 1.74452          | RNF17            | 1.81967          | TRIP6           | 1.848            |
| GSTA4           | 1.74179          | HTR4             | 1.81805          | RBP1            | 1.84417          |
| MTPAP           | 1.73828          | TEX13A           | 1.8171           | NCRNA00092      | 1.8396           |
| H2AFY2          | 1.73737          | UCA1             | 1.81527          | NR2E1           | 1.83522          |
| SNHG1           | 1.73661          | PSG4             | 1.81014          | SLC2A10         | 1.83456          |
| USP3            | 1.73578          | WNT10B           | 1.80637          | RAB34           | 1.81093          |
| TMEM100         | 1.72978          | KLK2             | 1.79624          | VAV3            | 1.80871          |
| HNRNPH3         | 1.72471          | PRSS1            | 1.79582          | MOSC2           | 1.80537          |
| RCOR2           | 1.71932          | KLK7             | 1.7957           | SLC43A3         | 1.80372          |
| CHST9           | 1.71447          | NOX1             | 1.79184          | PLAT            | 1.79212          |
| CALCRL          | 1.71421          | HRG              | 1.79063          | CCDC46          | 1.79065          |
| IRX2            | 1.71299          | SPATA16          | 1.79021          | TMEM220         | 1.78678          |
| HMX1            | 1.70177          | LMX1B            | 1.79002          | CLEC5A          | 1.78586          |
| KLRC3           | 1.6991           | DQX1             | 1.78908          | MT1M            | 1.78448          |
| DSCAML1         | 1.6876           | PRB3             | 1.78631          | F11R            | 1.7844           |
| KIAA0114        | 1.68251          | BEND4            | 1.7811           | PGCP            | 1.78087          |
| ZDHHC22         | 1.68147          | BCL2L14          | 1.78049          | AEBP1           | 1.77725          |
| KLRC4           | 1.67804          | SLC23A1          | 1.77772          | MAOB            | 1.77189          |
